# Supplementary material for: Clinical and Genomic Features of Patients with Renal Cell Carcinoma and Advanced Chronic Kidney Disease: Analysis of a Multi-Institutional Database
Source: MDPI journal article supplement (doi:10.3390/cancers16101920), 2024-05-18
Supplement: s1 [file s1]

**Supplementary Table S1. Significantly mutated genes in renal cell carcinoma identified by The Cancer Genome Atlas.**

| Histology       | Significantly Mutated Genes (SMGs)                                                                                                    |
|-----------------|---------------------------------------------------------------------------------------------------------------------------------------|
| Clear cell RCC  | <i>VHL, PBRM1, SETD2, KDM5C, PTEN, BAP1, MTOR, TP53, PIK3CA, MSRI, TXNIP, TCEB1, NFE2L2, BTNL3, SLITRK6, RHEB, ARID1A, NPNT, CCNB</i> |
| Papillary RCC   | <i>MET, SETD2, NF2, KDM6A, SMARCB1, FAT1, BAP1, PBRM1, STAG2, NFE2L2, TP53, FH, NF2</i>                                               |
| Chromophobe RCC | <i>TP53, PTEN, TERT, KIT</i>                                                                                                          |
| Oncocytoma      | <i>CCND1</i>                                                                                                                          |

**Supplementary Table S2. Somatic mutation rates in clear cell RCC specimens stratified by presence of ACKD.**

| Mutated Gene   | No ACKD<br><i>n</i> (%) | ACKD<br><i>n</i> (%) | Total<br><i>n</i> (%) | p value |
|----------------|-------------------------|----------------------|-----------------------|---------|
| Total          | 156 (81.7)              | 35 (18.3)            | 191                   |         |
| <i>VHL</i>     | 82 (52.6)               | 16 (45.7)            | 98 (51.3)             | 0.575   |
| <i>PBRM1</i>   | 65 (41.7)               | 12 (34.3)            | 77 (40.3)             | 0.452   |
| <i>SETD2</i>   | 41 (26.3)               | 6 (17.1)             | 47 (24.6)             | 0.287   |
| <i>KDM5C</i>   | 15 (9.6)                | 2 (5.7)              | 17 (8.9)              | 0.743   |
| <i>PTEN</i>    | 7 (4.5)                 | 1 (2.9)              | 8 (4.2)               | 1.000   |
| <i>BAP1</i>    | 20 (12.8)               | 1 (2.9)              | 21 (11.0)             | 0.132   |
| <i>MTOR</i>    | 18 (11.5)               | 4 (11.4)             | 22 (11.5)             | 1.000   |
| <i>TP53</i>    | 4 (2.6)                 | 3 (8.6)              | 7 (3.7)               | 0.117   |
| <i>PIK3CA</i>  | 11 (7.1)                | 1 (2.9)              | 12 (6.3)              | 0.699   |
| <i>MSRI</i>    | 1 (0.6)                 | 0 (0.0)              | 1 (0.5)               | 1.000   |
| <i>TXNIP</i>   | 4 (2.6)                 | 0 (0.0)              | 4 (2.1)               | 1.000   |
| <i>ELOC</i>    | 3 (1.9)                 | 1 (2.9)              | 4 (2.1)               | 0.558   |
| <i>NFE2L2</i>  | 8 (5.1)                 | 0 (0.0)              | 8 (4.2)               | 0.355   |
| <i>BTNL3</i>   | 1 (0.6)                 | 0 (0.0)              | 1 (0.5)               | 1.000   |
| <i>SLITRK6</i> | 2 (1.3)                 | 0 (0.0)              | 2 (1.0)               | 1.000   |
| <i>RHEB</i>    | 2 (1.3)                 | 1 (2.9)              | 2 (1.0)               | 0.457   |
| <i>ARID1A</i>  | 13 (8.3)                | 5 (14.3)             | 18 (9.4)              | 0.333   |
| <i>NPNT</i>    | 4 (2.6)                 | 1 (2.9)              | 5 (2.6)               | 1.000   |
| <i>CCNB1</i>   | 0 (0.0)                 | 1 (2.9)              | 1 (0.5)               | 0.183   |
| <i>MET</i>     | 1 (0.6)                 | 1 (2.9)              | 2 (1.0)               | 0.334   |
| <i>NF2</i>     | 3 (1.9)                 | 0 (0.0)              | 3 (1.6)               | 1.000   |
| <i>KDM6A</i>   | 5 (3.2)                 | 0 (0.0)              | 5 (2.6)               | 0.587   |
| <i>SMARCB1</i> | 1 (0.6)                 | 1 (2.9)              | 2 (1.0)               | 0.334   |
| <i>FAT1</i>    | 11 (7.1)                | 3 (8.6)              | 14 (7.3)              | 0.724   |

|              |         |         |         |       |
|--------------|---------|---------|---------|-------|
| <i>STAG2</i> | 4 (2.6) | 1 (2.9) | 5 (2.6) | 1.000 |
| <i>FH</i>    | 1 (0.6) | 0 (0.0) | 1 (0.5) | 1.000 |
| <i>TERT</i>  | 1 (0.6) | 0 (0.0) | 1 (0.5) | 1.000 |
| <i>KIT</i>   | 1 (0.6) | 1 (2.9) | 2 (1.0) | 0.334 |
| <i>CCND1</i> | 0 (0.0) | 0 (0.0) | 0 (0.0) | 1.000 |

**Supplementary Table S3. Univariable and multivariable analysis of *VHL* somatic mutational status in RCC specimens.**

|                             |             | No             | Yes            | OR (univariable)             | OR (multivariable)           |
|-----------------------------|-------------|----------------|----------------|------------------------------|------------------------------|
| <b>AKD</b>                  | No          | 131<br>(55.7)  | 104<br>(44.3)  | -                            | -                            |
|                             | Yes         | 39 (63.9)      | 22 (36.1)      | 0.71 (0.39-1.26,<br>p=0.250) | 0.76 (0.41-1.39,<br>p=0.371) |
| <b>Age at<br/>Diagnosis</b> | Mean (SD)   | 60.2<br>(12.2) | 60.2<br>(11.2) | 1.00 (0.98-1.02,<br>p=0.975) | -                            |
| <b>Sex</b>                  | Female      | 59 (56.2)      | 46 (43.8)      | -                            | -                            |
|                             | Male        | 111<br>(58.1)  | 80 (41.9)      | 0.92 (0.57-1.50,<br>p=0.749) | -                            |
| <b>Histology</b>            | Clear Cell  | 93 (48.7)      | 98 (51.3)      | -                            | -                            |
|                             | Papillary   | 27 (84.4)      | 5 (15.6)       | 0.18 (0.06-0.44,<br>p=0.001) | 0.18 (0.06-0.46,<br>p=0.001) |
|                             | Chromophobe | 20<br>(100.0)  | 0 (0.0)        | -                            | -                            |
|                             | NOS         | 30 (56.6)      | 23 (43.4)      | 0.73 (0.39-1.34,<br>p=0.309) | 0.74 (0.40-1.36,<br>p=0.327) |
| <b>Stage</b>                | I           | 84 (61.8)      | 52 (38.2)      | -                            | -                            |
|                             | II          | 14 (45.2)      | 17 (54.8)      | 1.96 (0.89-4.37,<br>p=0.094) | -                            |
|                             | III         | 57 (57.0)      | 43 (43.0)      | 1.22 (0.72-2.06,<br>p=0.461) | -                            |
|                             | IV          | 15 (51.7)      | 14 (48.3)      | 1.51 (0.67-3.39,<br>p=0.318) | -                            |
